# Supplementary material for: Dual Extended State Observer Based Feedback Linearizing Control for Magnetic Levitation System with Mismatched Disturbances and Uncertainties
Source: Preprints.org preprint supplement (doi:10.20944/preprints202302.0336.v1), 2023-02-20
Supplement: Supplementary file 1 [file supplementary]

Supplementary Materials: Dual-Extended State Observer-Based Feedback Linearizing Control for a Nonlinear System with Mismatched Disturbances and Uncertainties

Ravi Gandhi 1, Dipak Adhyaru 2, Gulshan Sharma 3,* and Pitshou N. Bokoro 3


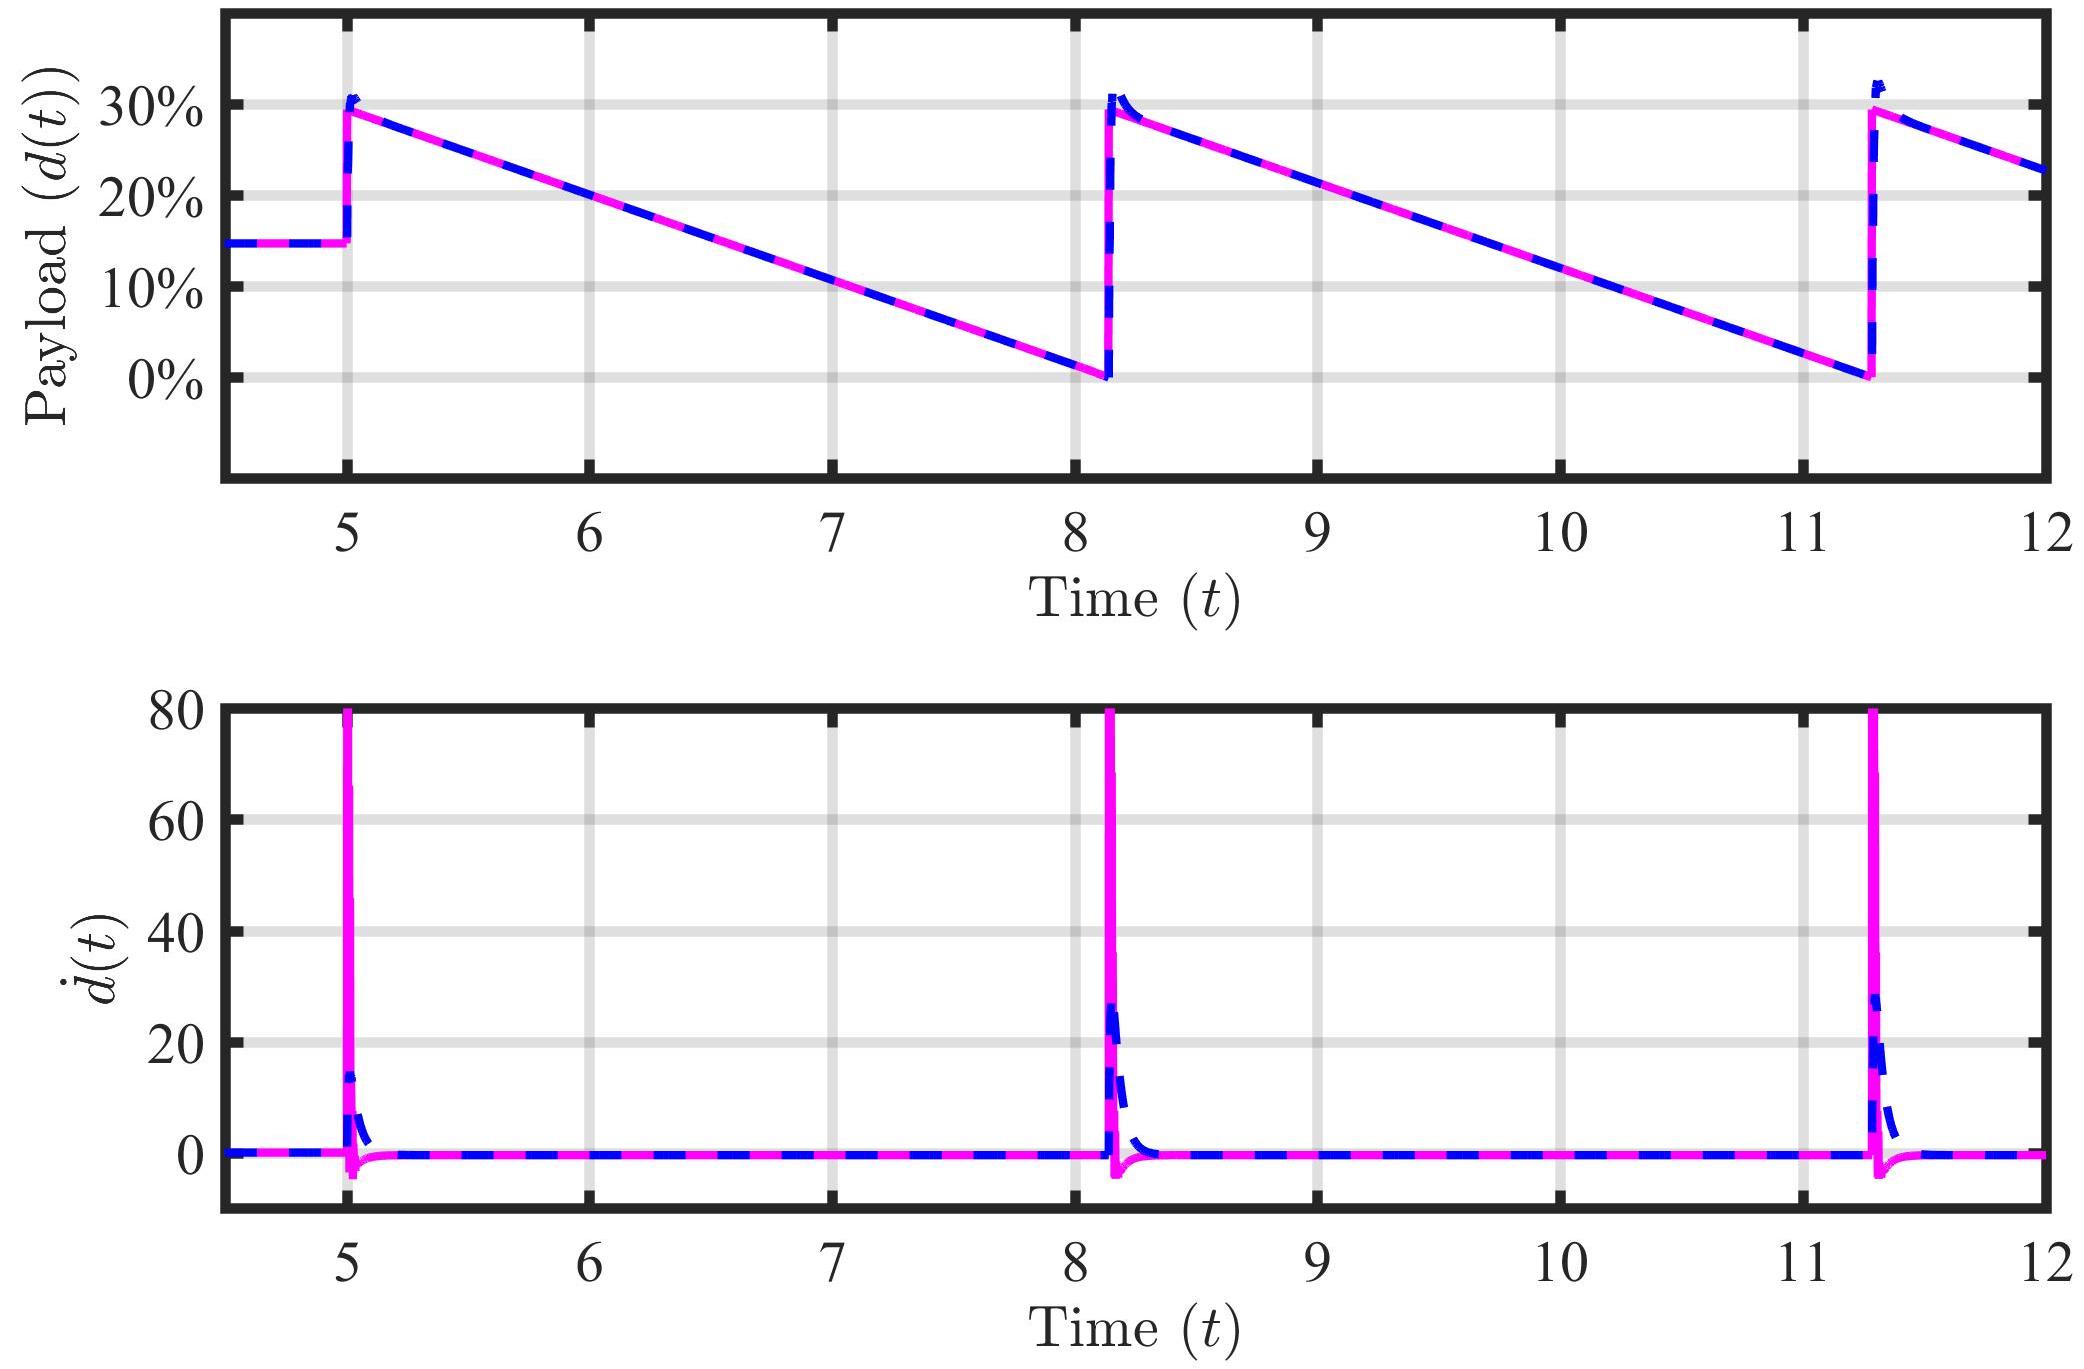


**Figure S1.** DESO based estimation of square-wave payload disturbance and its first-order derivative.

**
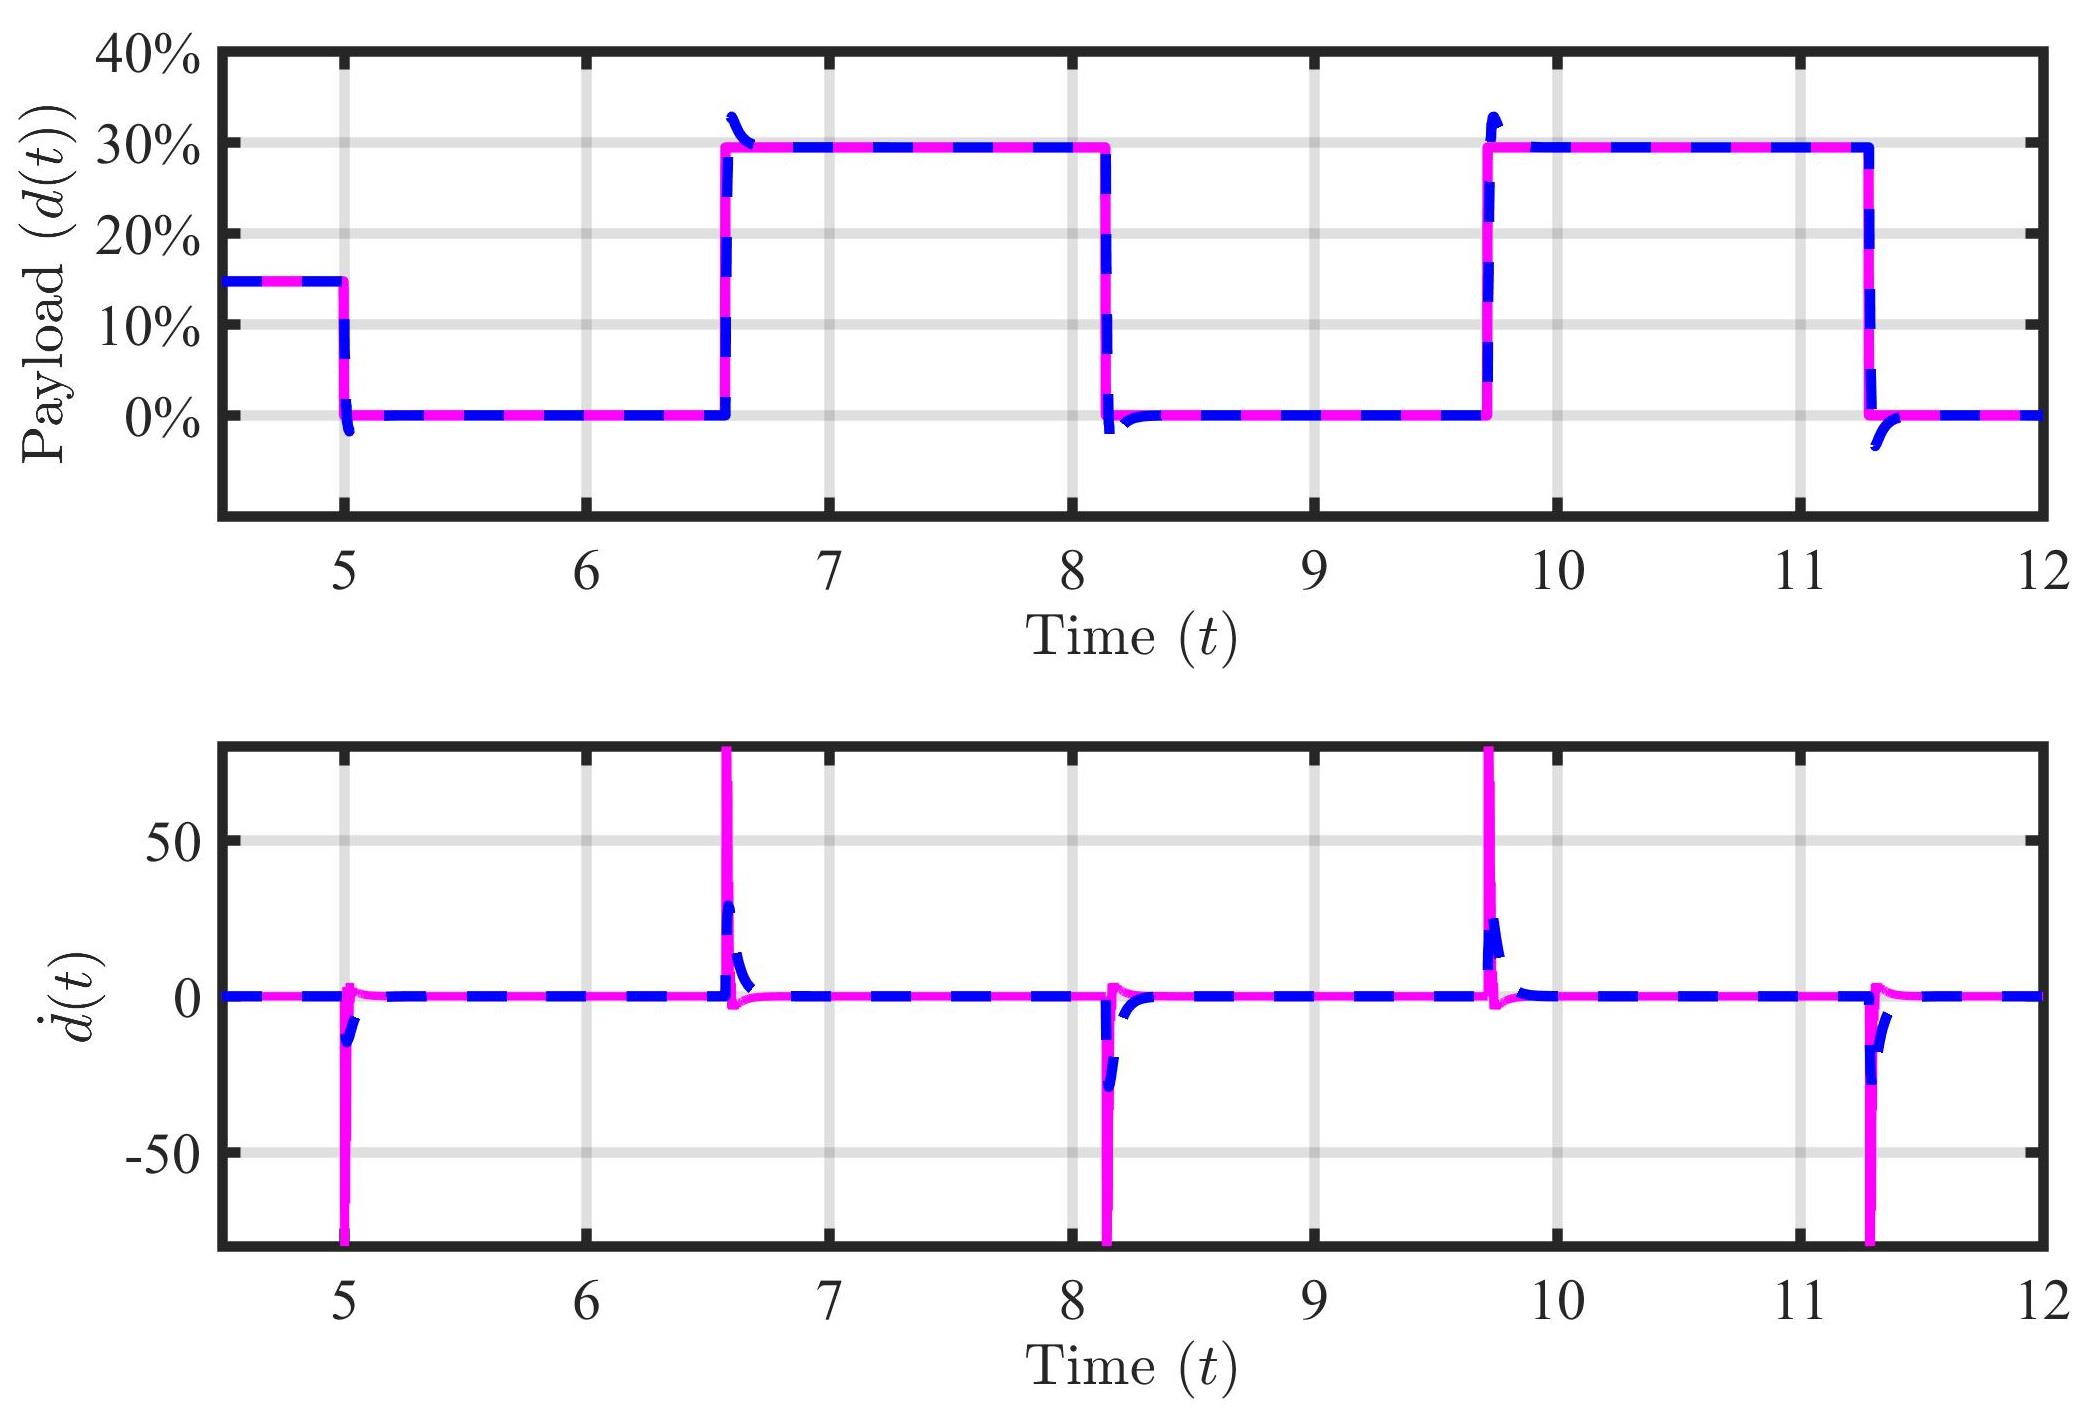
**

**Figure S2.** DESO based estimation of sawtooth-wave payload disturbance and its first-order derivative.
